# Supplementary material for: Genetics and primary care: where are we headed?
Source: Springer Nature journal article supplement (doi:10.1186/s12967-014-0238-6), 2014-08-27
Supplement: MOESM1 [file 9766334]

**Table 1** Summary of translation considerations for genomic medicine and primary care

| Variable in Translation             | Primary Care                                                                                               | Genomic Medicine                             | ELSi Considerations                                                                                                                                                       |
|-------------------------------------|------------------------------------------------------------------------------------------------------------|----------------------------------------------|---------------------------------------------------------------------------------------------------------------------------------------------------------------------------|
| Patient population                  | Families, communities, entire practices                                                                    | Single, genetically unique patient           | Respect for persons; relational decision-making;                                                                                                                          |
| Technological Capacities            | Basic, minimal                                                                                             | Data-intensive sequencing machines           | Lack of clinical validity and utility for CCCs; professional responsibilities, patient informed consent, disclosure of information, interpreting actionable genetic risks |
| Meeting health needs                | Holistic, general approaches to care; acuity to physical and psychosocial elements of health and wellbeing | Molecular conception of health and disease   | Sociocultural and environmental understanding health; supra-genetic determinants of health                                                                                |
| Health information                  | Electronic health record                                                                                   | Electronic health record                     | Data-intensive storage platforms needed with controlled access; privacy concerns                                                                                          |
| Graduate and post-graduate training | Standardized                                                                                               | Under development                            | Professional responsibilities; lack of specific expertise                                                                                                                 |
| Standards of Care                   | Established by professional medical bodies                                                                 | Under development                            | Resource constraints; professional capacities; management of incidental findings; rights 'not to know'                                                                    |
| Health education                    | Frontline health educators for global factors of health and disease                                        | Educators on genomic determinants of disease | Genetic exceptionalism                                                                                                                                                    |

**Table 2** Evaluation questions 42-44 of the ACCE Model [36]

| ELSi evaluation |                                                                                                                                                                         |
|-----------------|-------------------------------------------------------------------------------------------------------------------------------------------------------------------------|
| ...             |                                                                                                                                                                         |
| 42              | What is known about stigmatization, discrimination, privacy/confidentiality and personal/family social issues?                                                          |
| 43              | Are there legal issues regarding consent, ownership of data and/or samples, patents, licensing, proprietary testing, obligation to disclose, or reporting requirements? |
| 44              | What safeguards have been described and are these safeguards in place and effective?                                                                                    |
